# Global evolutionary dynamics and resistome analysis of *Clostridioides difficile* ribotype 017

Korakrit Imwattana,<sup>1,2</sup> Papanin Putsathit,<sup>3</sup> Teera Leepattarakit,<sup>2</sup> Pattarachai Kiratisin,<sup>2</sup> Thomas V Riley,<sup>1,3,4,5</sup> Daniel R Knight,<sup>1,4\*</sup>

<sup>1</sup> School of Biomedical Sciences, The University of Western Australia, Western Australia. <sup>2</sup> Faculty of Medicine Siriraj Hospital, Mahidol University, Thailand. <sup>3</sup> School of Medical and Health Sciences, Edith Cowan University, Western Australia. <sup>4</sup> Medical, Molecular and Forensic Sciences, Murdoch University, Western Australia. <sup>5</sup> Department of Microbiology, PathWest Laboratory Medicine, Queen Elizabeth II Medical Centre, Western Australia.

\*Address correspondence to Dr Daniel R. Knight ([daniel.knight@murdoch.edu.au](mailto:daniel.knight@murdoch.edu.au)), Medical, Molecular and Forensic Sciences, Murdoch University, Murdoch, Western Australia.

Keywords: *Clostridioides difficile*, ribotype 017, population, evolution, AMR, outbreaks.

## 1 Abstract

2 *Clostridioides difficile* PCR ribotype (RT) 017 ranks among the most successful strains of  
3 *C. difficile* in the world. In the past three decades, it has caused outbreaks on four continents,  
4 more than other “epidemic” strains, however, our understanding of the genomic epidemiology  
5 underpinning the spread of *C. difficile* RT 017 is limited. Here, we performed high-resolution  
6 phylogenomic and Bayesian evolutionary analyses on an updated and more representative  
7 dataset of 282 non-clonal *C. difficile* RT 017 isolates collected worldwide between 1981 and  
8 2019. These analyses place an estimated time of global dissemination between 1953 and 1983  
9 and identified the acquisition of the *ermB*-positive transposon Tn6194 as a key factor behind  
10 global emergence. This coincided with the introduction of clindamycin, a key inciter of  
11 *C. difficile* infection, into clinical practice in the 1960s. Based on the genomic data alone, the  
12 origin of *C. difficile* RT 017 could not be determined, however, geographical data and records  
13 of population movement suggest that *C. difficile* RT 017 had been moving between Asia and  
14 Europe since the Middle Ages and was later transported to North America around 1860 (95%  
15 CI: 1622 – 1954). A focused epidemiological study of 45 clinical *C. difficile* RT 017 genomes  
16 from a cluster in a tertiary hospital in Thailand revealed that the population consisted of two  
17 groups of multidrug-resistant (MDR) *C. difficile* RT 017 and a group of early, non-MDR  
18 *C. difficile* RT 017. The significant genomic diversity within each MDR group suggests that  
19 although they were all isolated from hospitalised patients, there was likely a reservoir of  
20 *C. difficile* RT 017 in the community that contributed to the spread of this pathogen.

## 21 Impact statement

22 This study utilises genomic sequence data from 282 non-clonal *C. difficile* ribotype (RT) 017  
23 isolates collected from around the world to delineate the origin and spread of this epidemic  
24 lineage, as well as explore possible factors that have driven its success. It also reports a focused  
25 epidemiological investigation of a cluster of *C. difficile* RT 017 in a tertiary hospital in  
26 Thailand to identify possible sources of transmission in this specific setting.

## 27 **Data summary**

28 All new WGS data generated in this study has been submitted to the European Nucleotide  
29 Archive under the BioProject PRJEB44406 (sample accession ERS6268756 – ERS6268798).  
30 The complete genome of *C. difficile* MAR286 was submitted to GenBank under BioProject  
31 PRJNA679085 (accession CP072118). Details of all genomes included in the final analyses  
32 are available in the **Supplementary Document**, available at [10.6084/m9.figshare.14544792](https://doi.org/10.6084/m9.figshare.14544792).

## 33 **Introduction**

34 *Clostridioides difficile* PCR ribotype (RT) 017, or sequence type (ST) 37, ranks among the  
35 most successful strains of *C. difficile*. Despite producing only one functional toxin (toxin B),  
36 *C. difficile* RT 017 has spread widely and caused outbreaks globally (1). The severity of  
37 *C. difficile* infection (CDI) caused by RT 017 has been comparable to infection caused by  
38 *C. difficile* strains producing two or three toxins (2-4). One factor that may have contributed to  
39 the success of *C. difficile* RT 017 is antimicrobial resistance (AMR) (5).

40 The evolutionary origins of *C. difficile* RT 017 remain contentious (1). Possible  
41 contributing factors included the early erroneous dismissal of *C. difficile* RT 017 as non-  
42 pathogenic due to its lack of toxin A (6), and the use of diagnostic tests that only detected toxin  
43 A (7). By the time that the pathogenicity of *C. difficile* RT 017 was recognised (1995) (8), the  
44 strain had already spread across the globe (1). Based on the geographical distribution of  
45 *C. difficile* clades, *C. difficile* RT 017, a member of evolutionary clade 4, has been hypothesised  
46 to have originated in Asia (1). This is supported by various epidemiologic studies reporting a  
47 high prevalence of *C. difficile* RT 017 and closely related clade 4 strains in Asia, especially  
48 Southeast Asia (9-13). However, most of these studies only included a few historical *C. difficile*  
49 RT 017 strains available from the region to verify this hypothesis (9-13). A 2017 study by  
50 Cairns *et al.* analysed whole-genome sequence (WGS) data from 277 *C. difficile* RT 017 strains  
51 and suggested an alternative hypothesis, that *C. difficile* RT 017 originated in North America,  
52 spread to Europe in the early 1990s and later to other regions (14). Despite the large dataset,  
53 this conclusion might have been influenced by a strain selection bias, as the North American  
54 strains included in the study were relatively older than strains from other regions. A recent  
55 study based mainly on the same global dataset agreed that *C. difficile* RT 017 spread first from  
56 North America but suggested that the spread may have happened before 1970 (15). In our  
57 study, we included a larger number of strains, with a few early European strains and a greater  
58 diversity of Asian strains. We aimed to further explore the origin and spread of *C. difficile*  
59 RT 017, as well as the key genetic factors driving its success.

## 60 **Methods**

### 61 *C. difficile* RT 017 genomes

62 This study included 933 *C. difficile* RT 017 strains from three collections; a set of 45 clinical  
63 *C. difficile* RT 017 strains from Thailand (32 phenotypically MDR and 13 non-MDR) some of  
64 which have been described previously (16), 102 previously unpublished *C. difficile* RT 017  
65 strains from our laboratory's collection and 786 *C. difficile* RT 017 genomes publicly available  
66 at the NCBI Sequence Read Archive (<https://www.ncbi.nlm.nih.gov/sra/>) as of January 2020.  
67 These collections included genomes of three *C. difficile* RT 017 isolated in the early 1980s  
68 (courtesy of Dr Jon Vernon and Prof Mark Wilcox in Leeds, but originally part of Prof SP  
69 Borriello's collection) (17). Multilocus sequence typing (MLST) was performed directly from  
70 sequence read files using SRST2 v0.2.0 and the PubMLST *C. difficile* database  
71 (<https://pubmlst.org/organisms/clostridioides-difficile/>) as previously described (18, 19).

## 72 Assembly of a new complete *C. difficile* RT 017 genome from SE Asia

73 To facilitate phylogenomic analysis of *C. difficile* strains from Thailand, a Thai *C. difficile*  
74 strain was selected for hybrid assembly of a closed reference genome. *C. difficile* MAR286  
75 was a non-MDR strain as opposed to the existing MDR reference strain *C. difficile* M68 (20).  
76 The short-read sequencing was performed on an Illumina HiSeq sequencing platform  
77 (Illumina, San Diego, CA) using 150-bp paired-end chemistry to a depth of 39X coverage as  
78 previously described (19). The long-read sequencing was performed on a MinION sequencing  
79 (Nanopore, Oxford, UK). The sequencing libraries were prepared using the Ligation  
80 Sequencing Kit (SQK-LSK109) and run on a FLO-MIN106 (R9.4.1) flow cell, according to  
81 the manufacturer's instructions, for 24 h. Hybrid assembly was performed with Unicycler  
82 v0.4.8 using a conservative mode (21). The final assembly graph was visualised and polished  
83 with Bandage v0.8.1 (22). Genome annotation was performed using the NCBI Prokaryotic  
84 Genomes Annotation Pipeline (23).

## 85 AMR genotyping

86 AMR genotyping was performed as previously described (24). Briefly, all read files were  
87 interrogated against the ARGannot database (for known accessory AMR genes) with two  
88 additional genes recently described in *C. difficile*, *erm*(52) and *mefH* (16), and a customised  
89 *gyrA*, *gyrB* and *rpoB* alleles database (for known resistance-conferring point mutations) using  
90 SRST2 (18, 25). Strains that were positive for either *ermB* or *tetM* were interrogated for known  
91 transposons using SRST2 as previously described (18).

## 92 Evolutionary analysis of *C. difficile* RT 017

93 To investigate the evolution and spread of *C. difficile* RT 017, core genome single nucleotide  
94 polymorphism (cgSNP) and Bayesian evolutionary analyses were performed. All PE reads  
95 were trimmed using TrimGalore v0.6.4 to remove low-quality and adapter sequences  
96 (<https://github.com/FelixKrueger/TrimGalore>), mapped to the genome of *C. difficile* M68 and  
97 variants identified using Snippy v4.4.5 (<https://github.com/tseemann/snippy>). The resulting  
98 VCF file was then screened to exclude variants occurring in the repetitive region using SnpSift  
99 v4.3t (26) and to exclude indels using VCF-annotate v0.1.15 (27). Gubbins v2.4.1 was used to  
100 identify and remove recombination sites (28). SNP-dists v0.7.0 was used to generate a pairwise  
101 cgSNP table (<https://github.com/tseemann/snp-dists>). Following the approach of Eyre *et al* (29)  
102 and Didelot *et al* (30), a threshold of 0-2 cgSNPs was used to determine if groups of 2 or more  
103 strains were clonally related.

104 To facilitate the Bayesian analysis, clonal strains were removed from the dataset leaving  
105 only one representative for each clonal cluster. Bayesian evolutionary analysis was performed  
106 using BactDating v1.0.1 (31). BactDating was run using a Gubbins recombination-adjusted  
107 phylogenetic tree from the previous analysis (1455 sites) as an input with the following  
108 settings: Markov chain Monte Carlo (MCMC) chains of  $5 \times 10^8$  iterations sampled every  $5 \times$   
109  $10^5$  iterations with a 50% burn-in and a strict model with a rate of 1.4 mutations per genome  
110 per year as published by Didelot *et al* (30). Traces were inspected to ensure convergence and  
111 the effective sample sizes (ESS) for all estimated continuous variables were  $>200$ . The final  
112 Bayesian tree was annotated using iTOL v6 (32). An interactive version of the Bayesian  
113 phylogenetic tree in **Figure 2** was uploaded to Microreact and is available at  
114 <https://microreact.org/project/v89tzQ8rii55PkAGF5Jo2r/64c80194> (33).

115 Bayesian analysis was also performed on a subset of 45 Thai *C. difficile* genomes, for  
116 which patient data and phenotypic AMR results were available (16, 34). The cgSNP analysis  
117 was performed using reference genomes listed in **Table 1** to evaluate whether the choice of

118 reference genome had any effect on downstream analysis. A pairwise whole genome average  
119 nucleotide identity (ANI) between each *C. difficile* strain and the reference strains was  
120 generated using FastANI (35), and the results were used to compare strain relatedness with  
121 each reference.

**Table 1 – Effect of the choice of reference genome on cgSNP analysis.**

| Reference | ST (clade) | Accession  | Mapped length (bp)* | N SNPs | % ANI  |
|-----------|------------|------------|---------------------|--------|--------|
| MAR286    | 37 (4)     | CP072118.1 | 4,134,703.82        | 311    | 99.88% |
| M68       | 37 (4)     | FN668375.1 | 4,176,850.73        | 308    | 99.93% |
| 630       | 54 (1)     | AM180355.1 | 3,836,370.82        | 267    | 97.98% |
| M120      | 11 (5)     | FN665653.1 | 3,579,796.21        | 235    | 96.11% |

Note: ANI, average nucleotide identity; SNPs, single nucleotide polymorphisms; ST, sequence type;  
\* average mapped length.

## 122 Pangenome-wide association study

123 The cgSNP and Bayesian analyses identified two distinct *C. difficile* RT 017 sublineages. To  
124 determine significant genetic loci associated with each lineage, all *C. difficile* genomes were  
125 assembled and a pangenome-wide association study (pan-GWAS) performed as previously  
126 described (36). Briefly, Panaroo v1.1.0 was run with default settings on the annotated  
127 *C. difficile* genomes (37), and the results used as an input for Scoary v1.6.16 to identify the  
128 significant genetic loci associated with each lineage (38).

## 129 Assessment of virulence-associated phenotypes

130 We also evaluated the phenotypes associated with virulence in *C. difficile* RT 017 from the two  
131 lineages; *C. difficile* strain 1470 (ATCC 43598, non-epidemic lineage [NE]), MAR006  
132 (epidemic lineage [E]), MAR024 (lineage E) and MAR 286 (lineage NE). First, a motility assay  
133 was performed as described by Tasteyre *et al* (39). Second, cell aggregation was assessed by  
134 measuring the optical density at 600 nm (OD<sub>600</sub>) of the undisturbed and disturbed 48-hour-old  
135 growth in brain heart infusion broth (40). These tests were performed with at least three  
136 biological replicates. *C. difficile* strain IS58 (RT 033, non-motile) was included as a negative  
137 control (41).

## 138 Statistical analysis

139 All statistical analyses were performed using online tools by Social Science Statistics available  
140 at <https://www.socscistatistics.com/>. A p-value of  $\leq 0.05$  was considered statistically  
141 significant.

## 142 Ethics approval

143 This study involved the use of de-identified patient data. It was approved by the Human  
144 Research Ethics Committee of The University of Western Australia (reference file  
145 RA/4/20/4704) and the Siriraj Institutional Review Board (protocol number 061/2558 [EC1]).

## 146 Results

### 147 The epidemic *C. difficile* RT 017 lineage emerged from Asia in the middle of the 20<sup>th</sup> Century

148 To study the global population structure of *C. difficile* RT 017, cgSNP and Bayesian evolution  
149 analyses were performed on 282 non-clonal *C. difficile* RT 017 genomes collected worldwide  
150 between 1981 and 2019 (**Figure 1**). The overall median year of isolation for this dataset was  
151 2011 (quartile range [QR]: 2008 – 2014). The median years of isolation for the three main  
152 continents were as follow; Asia, 2014 (2010 – 2016), Europe, 2010 (2006 – 2012) and North  
153 America, 2009 (2004 – 2017). Based on the Bayesian analysis (**Figure 2**), the *C. difficile* RT  
154 017 population could be divided into two lineages: a non-epidemic lineage (NE), which could  
155 be further divided into three sublineages (NE<sub>1</sub>, NE<sub>2</sub> and NE<sub>3</sub>), and an epidemic lineage (E).  
156 **Table 2** summarises 11 lineage-defining SNPs identified. Sublineages NE<sub>1</sub>, NE<sub>2</sub> and NE<sub>3</sub>  
157 consisted mainly of strains from Europe, North America and Asia, respectively, and the  
158 common ancestor of the three sublineages was estimated to have emerged in 1588 (95%  
159 confidence interval [CI]: 758 – 1858). Sublineages NE<sub>1</sub> and NE<sub>2</sub> split around 1860 (95% CI:  
160 1622 – 1954). Lineage E was estimated to have split from sublineage NE<sub>3</sub> around 1958 (95%  
161 CI: 1920 – 1977) and later spread globally around 1970 (95% CI: 1953 – 1983).

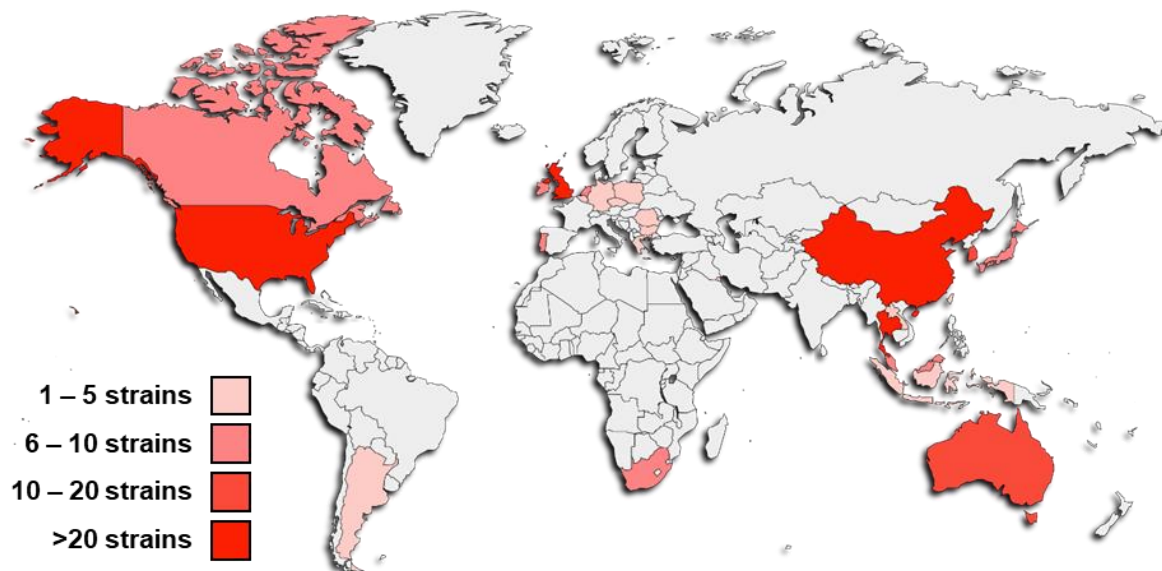

**Figure 1 – The countries of origin of the final 282 *C. difficile* RT 017 genomes.** The number of genomes in each region is as follows: Africa, 6; Asia, 126; Australia, 15; Europe, 96; North America, 48; South America, 4. The world map was created by tools available at [paintmaps.com](http://paintmaps.com).

### 162 The acquisition of *ermB* was likely the driving factor of the epidemic *C. difficile* RT 017 lineage

163 After incorporating genotypic AMR data, an association between the acquisition of AMR  
164 genotype and the spread of *C. difficile* RT 017 was evident. Genotypically MDR *C. difficile*  
165 RT 017 strains were in the lower part of sublineage NE<sub>3</sub> and lineage E, and only emerged  
166 around 1935 (95% CI: 1851 – 1969). There had been multiple acquisition events for the two  
167 most common accessory AMR determinants: *tetM* and *ermB*. The earliest acquisition of *tetM*  
168 was likely through gaining Tn916 which occurred around 1914 (95% CI: 1799 – 1964), while  
169 the earliest acquisition of *ermB* was likely through gaining Tn6194 which occurred around  
170 1958 (95% CI: 1920 – 1977), notably the same timeframe as the predicted time of emergence  
171 of lineage E.

172 Nonsynonymous substitutions in RpoB (H502N, conferring rifamycin resistance) and  
 173 in GyrA (T82I, conferring fluoroquinolone resistance) were found scattered throughout the  
 174 population. In contrast, an R505K substitution in RpoB was found only in strains from  
 175 sublineage NE<sub>3</sub> and lineage E and was more common among Asian strains (37.2% vs 8.9%,  
 176  $p < 0.0001$ ). The only European strains with an R505K substitution in RpoB were from an  
 177 outbreak in Portugal (42). Three independent GyrB substitution events were identified in this  
 178 dataset: two D426N substitution events in North America around 2008 (95% CI: 1998 – 2011)  
 179 and 2015 (95% CI: 2012 – 2016), and one D426V substitution event in Ireland (*C. difficile*  
 180 M68, the reference strain) around 2004 (95% CI: 2001 – 2005) (★ in **Figure 2**). In addition to  
 181 the important AMR determinants described above, the *aac6-aph2* gene was also common  
 182 among *C. difficile* RT 017, found in 73 strains in this dataset (25.9%), more commonly among  
 183 Asian strains (43.4% vs 14.2%,  $p < 0.0001$ ).

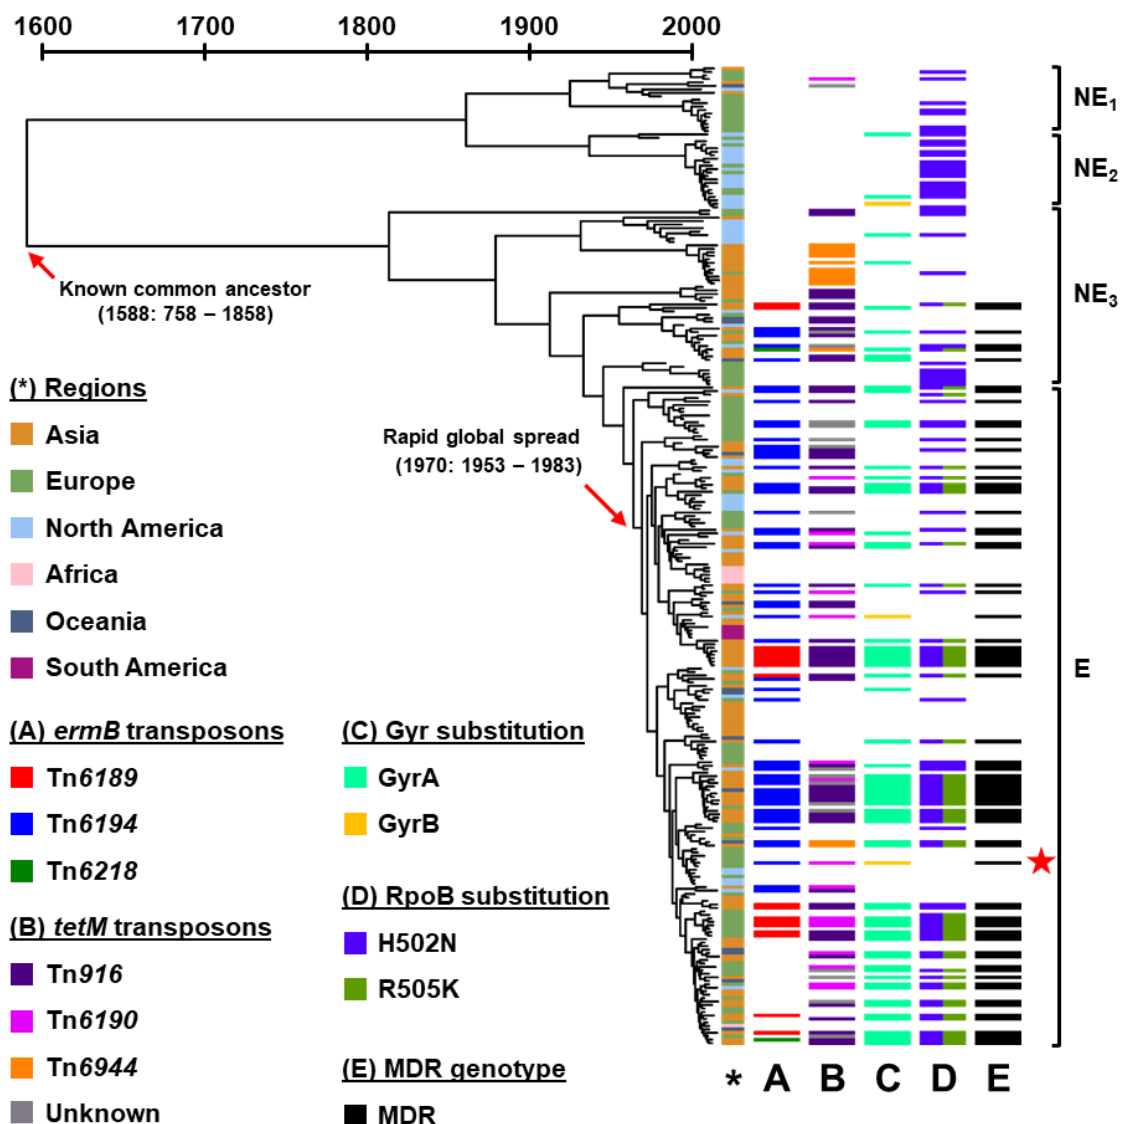

**Figure 2 – Bayesian tree of 282 non-clonal *C. difficile* RT 017 genome from around the world.** *C. difficile* RT 017 population could be divided into non-epidemic (NE; sublineages NE<sub>1</sub> – NE<sub>3</sub>) and epidemic (E) lineages. (\*) refers to the region of origin for each strain. Important genotypic AMR determinants are displayed on the right (A – E). (★) represents *C. difficile* M68, the reference genome in this analysis.

**Table 2 – List of lineage-defining cgSNPs.**

| Position *                                                                        | Strand ** | Product                                             | <i>dN</i> /<br><i>dS</i> *** | Lineages        |                 |                 |   |
|-----------------------------------------------------------------------------------|-----------|-----------------------------------------------------|------------------------------|-----------------|-----------------|-----------------|---|
|                                                                                   |           |                                                     |                              | NE <sub>1</sub> | NE <sub>2</sub> | NE <sub>3</sub> | E |
| <b>Lineage NE vs lineage E</b>                                                    |           |                                                     |                              |                 |                 |                 |   |
| 867,703                                                                           | F         | Diguanylate kinase signalling protein               | <i>dN</i>                    | G <sup>†</sup>  | G <sup>†</sup>  | G <sup>†</sup>  | T |
| <b>Sublineages NE<sub>1</sub> and NE<sub>2</sub> vs sublineage NE<sub>3</sub></b> |           |                                                     |                              |                 |                 |                 |   |
| 263,571                                                                           | F         | FlgG                                                | <i>dN</i>                    | T <sup>†</sup>  | T <sup>†</sup>  | C               | C |
| 480,088                                                                           | R         | UvrA                                                | <i>dS</i>                    | A <sup>†</sup>  | A <sup>†</sup>  | G               | G |
| 1,486,937                                                                         | F         | Gfo/Idh/MocA family oxidoreductase                  | <i>dN</i>                    | T <sup>†</sup>  | T <sup>†</sup>  | G               | G |
| 1,789,300                                                                         | F         | Serine O-acetyltransferase                          | <i>dS</i>                    | C <sup>†</sup>  | C <sup>†</sup>  | T               | T |
| 3,254,867                                                                         | R         | ABC transporter                                     | <i>dN</i>                    | T <sup>†</sup>  | T <sup>†</sup>  | C               | C |
| 3,808,791                                                                         | N/A       | Non-coding region                                   | -                            | G <sup>†</sup>  | G <sup>†</sup>  | A               | A |
| <b>Sublineage NE<sub>1</sub> vs sublineage NE<sub>2</sub></b>                     |           |                                                     |                              |                 |                 |                 |   |
| 1,299,679                                                                         | F         | Penicillin-binding protein 2                        | <i>dN</i>                    | G               | T <sup>†</sup>  | G               | G |
| 1,486,584                                                                         | F         | Gfo/Idh/MocA family oxidoreductase                  | <i>dN</i>                    | C               | T <sup>†</sup>  | C               | C |
| 2,928,003                                                                         | R         | ABC transporter                                     | <i>dN</i>                    | G               | T <sup>†</sup>  | G               | G |
| 3,066,957                                                                         | R         | Thioether cross-link-forming SCIFF peptide maturase | <i>dN</i>                    | C               | T <sup>†</sup>  | C               | C |

\* Position on *C. difficile* M68 genome; \*\* coding strand (F, forward; R, reverse); \*\*\* nonsynonymous substitutions (*dN*) and synonymous substitutions (*dS*); † different from the reference genome.

184 The epidemic *C. difficile* RT 017 lineage expresses higher motility and lower cell aggregation

185 The cgSNP that differentiated between the lineages NE and E resulted in a substitution in a  
 186 diguanylate kinase signalling protein, which may play role in motility and biofilm formation  
 187 in *C. difficile* (40, 43). Thus, motility and cell aggregation assays were performed (**Figure 3**).  
 188 Strains from lineage E had an increase in growth diameter compared to lineage NE (average  
 189 diameter 7.7 vs 5.9 mm, Mann-Whitney  $p < 0.0001$ ) and a slight decrease in the level of cell  
 190 aggregation as shown by the lower change in OD<sub>600</sub> between undisturbed and disturbed cultures  
 191 (0.88 vs 0.99, Mann-Whitney  $p = 0.0316$ ; for comparison, the non-motile *C. difficile* IS58 had  
 192 1.84 fold-change in OD<sub>600</sub>).

193 In addition to the lineage-specific cgSNPs (**Table 2**) and the difference in the  
 194 prevalence of genotypic AMR, pan-GWAS was performed to identify other significant lineage-  
 195 specific genetic loci. A total of 32,863 genes was identified in the dataset, 3,560 (10.8%) of  
 196 which were found in more than 95% of strains and classified as core genes. Based on the  
 197 GWAS, the locus most significantly associated with lineage E was the aminoglycoside  
 198 resistance locus (containing *aac6-aph2* and a gene resembling *ant6(Ib)* [72% identity, E-value  
 199 = 5.01e-157]; sensitivity 85.3%, specificity 97.8%). Apart from AMR-related loci, lineage E  
 200 was associated with a truncation of the formate dehydrogenase FdhF protein (sensitivity 75.3%,  
 201 specificity 97.8%). A comparison of the FdhF protein is shown in **Figure 4** (44).

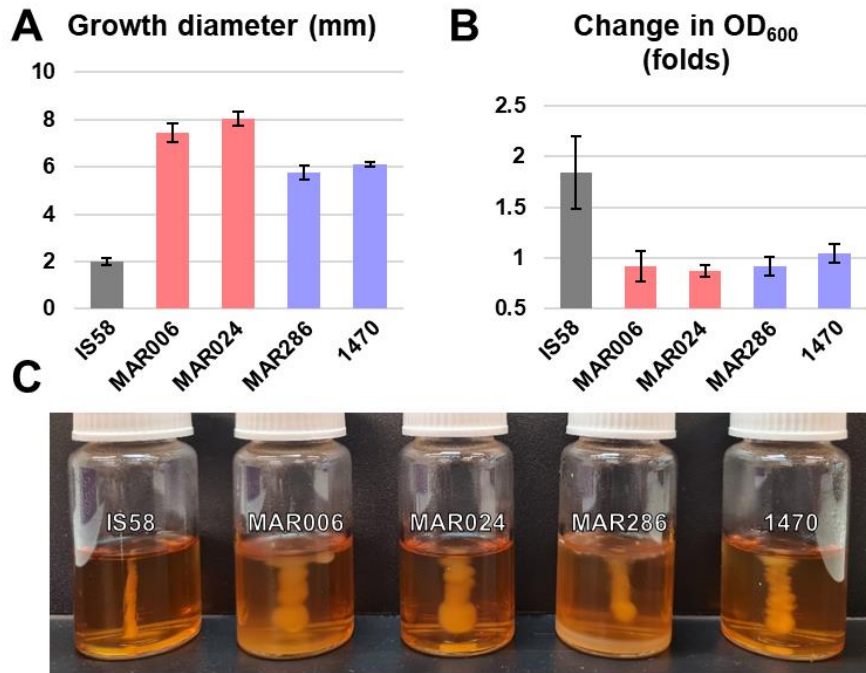

**Figure 3 – Comparison of virulence-related phenotypes between Lineages E (pink) and NE (lilac).** (A) Lineage E had a larger growth diameter in semi-solid media. (B) Lineage E displayed a lower cell aggregation as measured by the difference in OD<sub>600</sub> between undisturbed and disturbed broths. (C) The semisolid media for all tested strains. *C. difficile* IS58 (RT 033, dark grey) was used as a negative control. All error bars display 95% confidence intervals.

|            |                                                                |     |
|------------|----------------------------------------------------------------|-----|
| Lineage_E  | MSNSIPEIENADVLFIFGYNGADSHPIVANRIVKAKKNGAKLIVTDPRTVESARIADIHL   | 60  |
| Lineage_NE | MSNSIPEIENADVLFIFGYNGADSHPIVANRIVKAKKNGAKLIVTDPRTVESARIADIHL   | 60  |
| Lineage_E  | PIKGGTNMVLVNAFGNVLIEEGLYNKEFVQNHTQGFDEYKEIVKPYTAKYAEKITGIPEE   | 120 |
| Lineage_NE | PIKGGTNMVLVNAFGNVLIEEGLYNKEFVQNHTQGFDEYKEIVKPYTAKYAEKITGIPEE   | 120 |
| Lineage_E  | LIRKAMREYAKGKKAMILYGMGVCQFGQAVDVVKGLASIALLTGNFGRESVIGIPVRGQN   | 180 |
| Lineage_NE | LIRKAMREYAKGKKAMILYGMGVCQFGQAVDVVKGLASIALLTGNFGRESVIGIPVRGQN   | 180 |
| Lineage_E  | NVQGACDMGALPNVYPGYQNVTDKIREKFEKAWGVKLSPNNGYSLTQVPDLVLKEKCLK    | 240 |
| Lineage_NE | NVQGACDMGALPNVYPGYQNVTDKIREKFEKAWGVKLSPNNGYSLTQVPDLVLKEKCLK    | 240 |
| Lineage_E  | AYYIFGEDPVQSDPDASEVREALDELEFVIVQDIFMNTALHADVILPATSWGEHEGYVT    | 300 |
| Lineage_NE | AYYIFGEDPVQSDPDASEVREALDELEFVIVQDIFMNTALHADVILPATSWGEHEGYVT    | 300 |
| Lineage_E  | CADRGFQLMRKAIEPQGDVVKPDWQIIEIISTAMGYPMNYKNTKEIWDELRLQLCPSFLGAT | 360 |
| Lineage_NE | CADRGFQLMRKAIEPQGDVVKPDWQIIEIISTAMGYPMNYKNTKEIWDELRLQLCPSFLGAT | 360 |
| Lineage_E  | YEKIETQGCYVQWPKKSESMEDKGTMYLYEGQKFSTPNGKGNLFAAEWRPPKG-----     | 412 |
| Lineage_NE | YEKIETQGCYVQWPKKSESMEDKGTMYLYEGQKFSTPNGKGNLFAAEWRPPMEVEDDEYYPF | 420 |
| Lineage_E  | -----                                                          | 412 |
| Lineage_NE | SLCTVREVGHYSVRTMTGNCRTLSSLEDEPGRVQINSNDAEKLGIEDDELVRISRRGSV    | 480 |
| Lineage_E  | -----                                                          | 412 |
| Lineage_NE | ITRATVTRDRVKEGATYMTYQWVVGACNELTIANLDPISKTPEYKYCAVKLEKLEDQELAE  | 540 |
| Lineage_E  | -----                                                          | 412 |
| Lineage_NE | KCVREEYQSLKDKMTATNI-----                                       | 559 |

**Figure 4 – Truncation of FdhF protein in lineage E.** The alignment was produced using Clustal Omega version 1.2.4 (44). The highlighted part is the predicted NAD binding site, which absent in the protein from lineage E.



202 *C. difficile* RT 017 strains in Thailand were likely acquired outside of the hospital

203 **Table 3** compares genomes of *C. difficile* MAR286, the Thai reference genome, with  
 204 *C. difficile* M68. Based on the ANI values (**Table 1**), Thai *C. difficile* strains were closest to  
 205 *C. difficile* M68. Using *C. difficile* M68 as a reference resulted in the longest average mapped  
 206 length, significantly longer than *C. difficile* MAR286, the second closest reference genome  
 207 ( $p < 0.0001$ ). Accordingly, *C. difficile* M68 was chosen as a reference for the subsequent  
 208 analysis. The average number of pairwise cgSNP differences based on *C. difficile* M68 and  
 209 *C. difficile* MAR286 was 0.49 SNPs (95% CI: 0.44 – 0.54). The difference between *C. difficile*  
 210 strains in this study and the other two reference genomes was more pronounced resulting in a  
 211 greater number of pairwise cgSNP differences compared to *C. difficile* M68: 5.42 SNPs (95%  
 212 CI: 5.15 – 5.69) for *C. difficile* 630 and 9.39 SNPs (95% CI: 9.05 – 9.72) for *C. difficile* M120.

**Table 3 – Comparison of two *C. difficile* RT 017 reference genomes.**

| Parameters       | M68                                                                                                                   | MAR286                                                                           |
|------------------|-----------------------------------------------------------------------------------------------------------------------|----------------------------------------------------------------------------------|
| Accession        | FN668375.1                                                                                                            | CP072118.1                                                                       |
| Genome size (bp) | 4,308,325                                                                                                             | 4,242,261                                                                        |
| Genes            | 3,983                                                                                                                 | 3,892                                                                            |
| CDS              | 3,830                                                                                                                 | 3,761                                                                            |
| rRNA             | 40                                                                                                                    | 35                                                                               |
| tRNA             | 109                                                                                                                   | 92                                                                               |
| ncRNA            | 4                                                                                                                     | 4                                                                                |
| CRISPR array     | 4                                                                                                                     | 6                                                                                |
| % GC             | 28.9%                                                                                                                 | 28.8%                                                                            |
| AMR loci         | <i>ermB</i> (Tn6194) [MLS <sub>B</sub> ],<br><i>tetM</i> (Tn6190) [tetracyclines],<br>D426V (GyrB) [fluoroquinolones] | <i>ermB</i> (Tn6194) [MLS <sub>B</sub> ],<br><i>tetM</i> (Tn916) [tetracyclines] |
| Pairwise ANI     | 99.92%                                                                                                                |                                                                                  |

213 Using *C. difficile* M68 as a reference, 308 high-quality cgSNPs were identified across 45  
 214 *C. difficile* strains. The final Bayesian phylogenetic tree is shown in **Figure 5**. Based on this  
 215 phylogeny, 44 *C. difficile* RT 017 strains, excluding the outlier, could be classified roughly into  
 216 three groups: the oldest group (G1,  $n = 13$ ), most of which were non-MDR *C. difficile* RT 017,  
 217 a group of early MDR *C. difficile* RT 017 (G2,  $n = 15$ ) and the most recent and rapidly  
 218 expanding clade of MDR *C. difficile* RT 017 (G3,  $n = 16$ ). The common ancestor of all Thai  
 219 *C. difficile* RT 017 was estimated to have arisen around 1988 (95%CI: 1949 – 2000). The  
 220 common ancestors of the three groups were estimated to have arisen around 1999 (1993 –  
 221 2004), 2003 (1995 – 2007) and 2012 (2009 – 2013), respectively.

222 Seven small clonal groups (CGs) were identified across the tree (CG1 – CG7 in **Figure**  
 223 **5**), three of which (CG2, CG5 and CG7) were from different patients who were in the hospital  
 224 during the same period, suggesting possible direct patient-patient transmission (red boxes).  
 225 Two CGs (CG1 and CG3), and two small CGs in CG5, included strains that were isolated from  
 226 the same patients within 2 months, suggesting recurrence CDI (blue boxes). The other two CGs  
 227 (CG4 and CG6) included strains isolated from different patients without an obvious  
 228 epidemiological link, one of which included strains from two specimens collected 3 years apart,  
 229 suggesting contaminations in the hospital environment (red asterisks). The remaining  
 230 *C. difficile* strains were non-clonal.

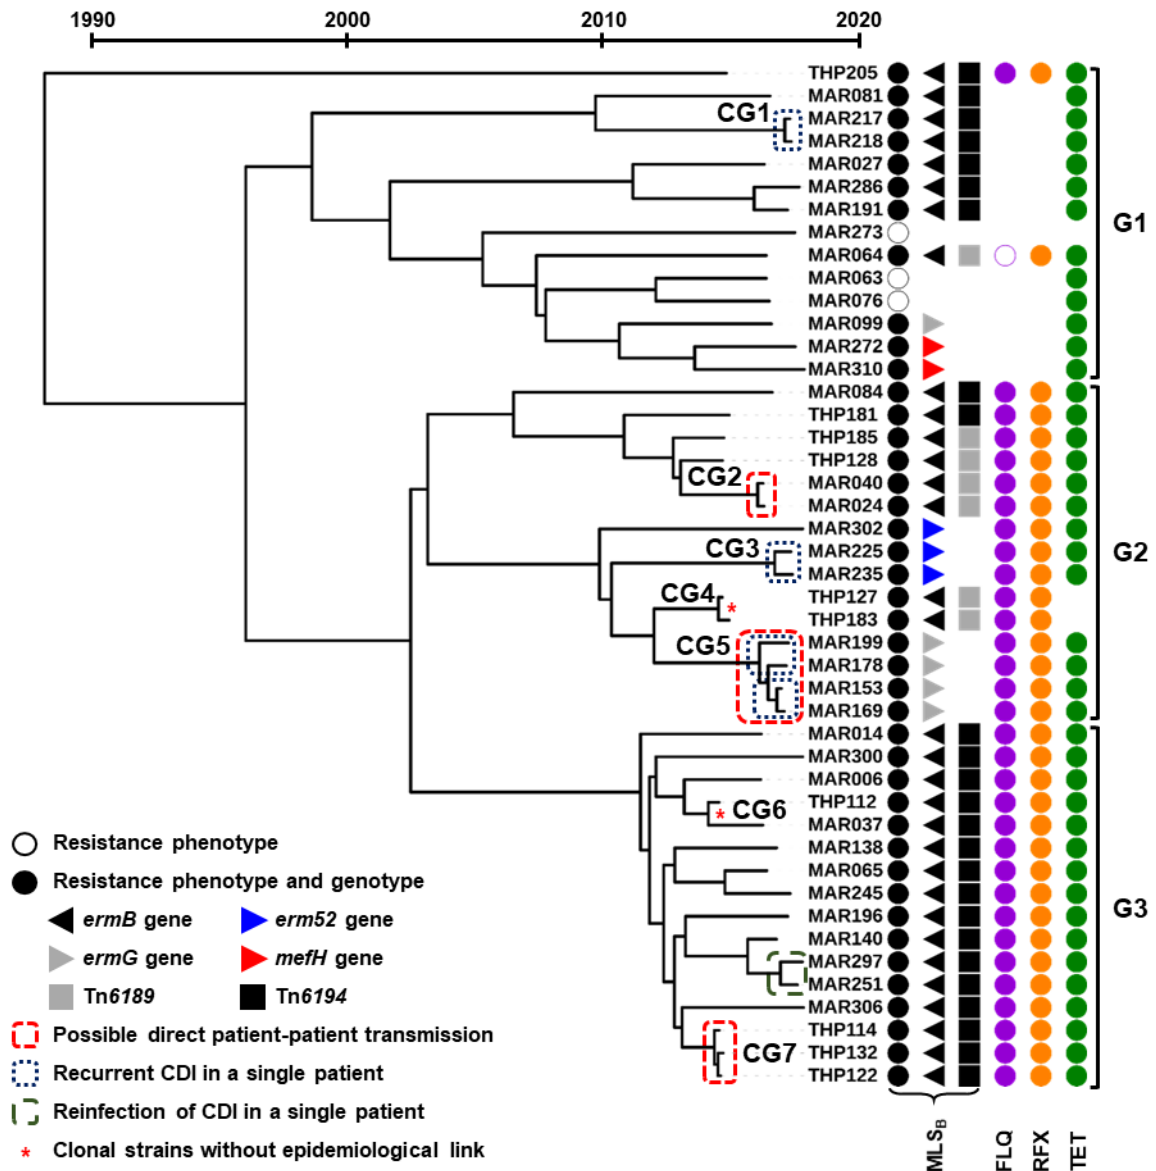

**Figure 5 – Bayesian tree of 45 Thai *C. difficile* RT 017.** “THP” refers to strains isolated in 2015 and “MAR” to strains isolated in 2017 – 2018. Red boxes indicate that the patients were in the same department when the strains were isolated. Blue boxes indicated that the strains were isolated from the same patient within 2 – 8 weeks.

## 231 Discussion

232 Despite being one of the most successful strains of *C. difficile*, very little is known about the  
233 evolution and spread of *C. difficile* RT 017. This study addresses this knowledge gap using  
234 high-resolution phylogenomic analyses on a comprehensive and diverse dataset of 282 global  
235 *C. difficile* RT 017 genomes. We found that the population of *C. difficile* RT 017 can be divided  
236 into two lineages, agreeing with the previous study by Cairns *et al* (14). However, data  
237 disagrees on the geographical origin of *C. difficile* RT 017. Our study suggests that *C. difficile*  
238 RT 017 may have originated in Asia, supporting the epidemiological studies (1), then spread  
239 to Europe and North America. This likely resulted from the inclusion of a few older European  
240 strains (isolated between 1981 and 1985) to reduce the gap in collection years between the two

241 continents ( $p = 0.6745$  in this dataset) and a large diversity of Asian strains from 11 countries  
242 and administrative regions.

243 Based on the difference in structure, the two lineages of *C. difficile* RT 017 were  
244 classified as non-epidemic (NE, a small number of strains with little population expansion) and  
245 epidemic (E, a larger number of strains with rapid population expansion) lineages. Although  
246 not exclusively containing strains from one continent, the NE lineage could be divided into  
247 three sublineages predominantly containing strains from Asia, Europe and North America. This  
248 suggests that the spread of *C. difficile* RT 017 between these continents had occurred since the  
249 end of the 16<sup>th</sup> century. This roughly coincides with the estimated time of PaLoc acquisition  
250 ~500 years ago (45). Sublineages NE<sub>1</sub> (Europe) and NE<sub>2</sub> (North America) were more closely  
251 related to one another than to sublineage NE<sub>3</sub> (Asia). In turn, sublineage NE<sub>3</sub> was more closely  
252 related to sublineage NE<sub>1</sub> than sublineage NE<sub>2</sub>, as demonstrated by fewer cgSNP differences  
253 (**Table 2**). Thus, the spread of *C. difficile* RT 017 likely began with population movement  
254 between Asia and Europe (1588, 95% CI: 758 – 1858) before spread from Europe to North  
255 America (1860, 95% CI: 1622 – 1954). The direction of the spread between Asia and Europe  
256 cannot be determined from this analysis, however, based on the high prevalence and diversity  
257 of clade 4 strains in Asia (9-12, 24), it is likely that *C. difficile* RT 017, as well as other strains  
258 in clade 4, originated in Asia, travelled to Europe and subsequently crossed the Atlantic to  
259 North America.

260 Even though *C. difficile* RT 017 could be found in at least three continents by the end  
261 of the 19<sup>th</sup> century, the Bayesian analysis suggests that the epidemic lineage E emerged solely  
262 from Asia (sublineage NE<sub>3</sub>) following the acquisition of *ermB*-positive Tn6194 in 1958 (95%  
263 CI: 1920 – 1977), before spreading globally in 1970 (95% CI: 1953 – 1983). The time of  
264 acquisition of the *ermB* element coincides with the introduction of clindamycin into clinical  
265 practice in the 1960s (46). This pattern of spread is similar to *C. difficile* RT 027, another  
266 epidemic strain that spread in and from North America in the early 2000s (47) driven by the  
267 acquisition of fluoroquinolone resistance in 1993/94 (47), following the widespread use of  
268 levofloxacin for community-acquired pneumonia (48). This provides supporting evidence that  
269 the use of antimicrobials and the acquisition of AMR determinants are significant in the spread  
270 of *C. difficile*. Although the prevalence of fluoroquinolone and rifamycin resistance was also  
271 high in *C. difficile*, the widespread resistance across all lineages suggests the independent  
272 acquisition of resistance after the spread of the strain.

273 The analyses were first performed on a small dataset of Thai clinical *C. difficile* RT 017  
274 isolates ( $n = 45$ ) with complete metadata to evaluate the performance of the pipeline. These  
275 analyses accurately identified four pairs of *C. difficile* strains isolated from the same patients,  
276 provided good correlations between AMR phenotypes and genotypes (16), as well as AMR  
277 genotypes and cgSNP population structure. When performed on the global dataset ( $n = 282$ ),  
278 the analyses accurately predicted the emergence of *C. difficile* M68 (2001 – 2005), a strain  
279 from a 2003 outbreak in Ireland (20). Also, appropriate timelines for the emergence of  
280 Argentinian (1996 – 2000) and Portuguese (2003 – 2011) clusters (42, 49) were estimated,  
281 supporting the accuracy of the analyses.

282 Besides the aforementioned AMR genes, the epidemic lineage E was also associated  
283 with the presence of an aminoglycoside resistance locus and a truncated FdhF protein. Being a  
284 strictly anaerobic bacterium, *C. difficile* is intrinsically resistant to aminoglycosides and the  
285 presence of an additional aminoglycoside-resistance locus is unlikely to have provided any  
286 advantage to the bacterium (50). However, it may suggest that the epidemic strains were from  
287 an area with a high prevalence of aminoglycoside-resistant enteric bacteria, especially  
288 enterococci (51). Formate dehydrogenase is an enzyme involved in the reoxidation of  
289 nicotinamide adenine dinucleotide (NAD) (52). Based on the prediction by the UniProt  
290 database (53), the truncated region is the coiled-coil domain that likely serves as a binding site

291 for NAD. Thus the truncated protein is likely non-functional, however, *C. difficile* has several  
292 pathways for oxidising NAD and the truncated FdhF may not ultimately have any effect on  
293 growth nor virulence (52). Another significant genetic variant associated with lineage E was a  
294 point substitution (W366L) on the diguanylate kinase signalling protein (**Table 2**). This protein  
295 is involved in the regulation of cyclic dimeric guanosine monophosphate (c-di-GMP) which  
296 plays a role in motility and biofilm formation (40, 43). In our preliminary assessment, strains  
297 from lineage E had increased motility and a decreased level of cell aggregation *in vitro*. Further  
298 *in vivo* studies are needed to determine how this change affects the virulence and  
299 transmissibility of the epidemic strains.

300 Analyses of the Thai clinical *C. difficile* strains provided information on disease  
301 transmission in the country that differs from a previous report from the UK (54). The UK study  
302 reported a cluster of closely related *C. difficile* RT 017 strains in a single hospital in London  
303 that was different to strains from other parts of the city, suggesting an intra-hospital outbreak  
304 (54). In the current study, all Thai strains were isolated in a single tertiary hospital over 4 years  
305 (2015 – 2018), however, most of them were not closely related. Overall, these strains were  
306 more related to *C. difficile* M68, a strain isolated in Ireland in a different decade (20), than to a  
307 non-epidemic strain from the same hospital. This suggests that the high prevalence of  
308 *C. difficile* RT 017 in the hospital was not due to an ongoing outbreak. Indeed, evidence of  
309 direct patient-patient transmission could be identified in only a few cases. The remaining cases  
310 acquired *C. difficile* RT 017 elsewhere, most likely from the community (55, 56).

311 This study also demonstrates the effect of reference genome selection on the  
312 downstream analysis (**Table 1**). The results were comparable when a reference from the same  
313 ST was used (an average of 0.49 SNPs difference, clonality cut-off point of 2 SNPs) (30).  
314 Differences became more pronounced as the reference strain became less related, suggesting  
315 that a reference genome from the same ST should be used to ensure accurate cgSNP results.  
316 With the introduction of ONT, it is now possible to assemble a complete genome of a local  
317 reference strain to maximise the accuracy of cgSNP analysis using a combination of short and  
318 long-read sequences.

319 A limitation of this study remained the relatively low number of early *C. difficile*  
320 RT 017 strains in general and the lack of older strains from Asia. This likely led to some  
321 uncertainty in the estimations, as reflected by wide 95% CIs, especially around the root of the  
322 Bayesian tree. Although it may be difficult to acquire old clinical strains, it may be possible to  
323 get historical strains from other sources. Soil is one promising source for ancient *C. difficile*,  
324 as it is a reservoir for *C. difficile* spores and several methods have been developed to measure  
325 the age of the soil (57), which can be used as a substitution for the collection date in a Bayesian  
326 evolutionary analysis.

327 In conclusion, *C. difficile* RT 017 had been circulating between Asia and Europe for  
328 centuries before spreading to North America. The epidemic lineage of *C. difficile* RT 017  
329 emerged from Asia in the middle of the 20<sup>th</sup> century following the acquisition of *ermB*. A  
330 focused investigation of contemporary *C. difficile* RT 017 in Thailand revealed that the  
331 population was highly diverse and community reservoirs/sources may have played an  
332 important role in the transmission of disease in this country.

### 333 **Acknowledgements**

334 This work was supported, in part, by funding from The Raine Medical Research Foundation  
335 (RPG002-19) and a Fellowship from the National Health and Medical Research Council  
336 (APP1138257) awarded to D.R.K. K.I. is a recipient of the Mahidol Scholarship from Mahidol  
337 University, Thailand. This research used the facilities and services of the Pawsey  
338 Supercomputing Centre [Perth, Western Australia].

### 339 Additional information

340 The **Supplementary Document** is available at DOI: [10.6084/m9.figshare.14544792](https://doi.org/10.6084/m9.figshare.14544792).

### 341 Conflict of interests

342 The authors declare that there are no conflicts of interest.

### 343 References

- 344 1. Imwattana K, Knight DR, Kullin B, Collins DA, Putsathit P, Kiratisin P, et al. *Clostridium*  
345 *difficile* ribotype 017 - characterization, evolution and epidemiology of the dominant strain in  
346 Asia. *Emerg Microbes Infect.* 2019;8(1):796-807.
- 347 2. Kim J, Kim Y, Pai H. Clinical characteristics and treatment outcomes of *Clostridium difficile*  
348 infections by PCR ribotype 017 and 018 strains. *PLoS One.* 2016;11(12):e0168849.
- 349 3. Kim J, Pai H, Seo MR, Kang JO. Clinical and microbiologic characteristics of *tcdA*-negative  
350 variant *Clostridium difficile* infections. *BMC Infect Dis.* 2012;12:109.
- 351 4. Goorhuis A, Debast SB, Dutilh JC, van Kinschot CM, Harmanus C, Cannegieter SC, et al.  
352 Type-specific risk factors and outcome in an outbreak with 2 different *Clostridium difficile*  
353 types simultaneously in 1 hospital. *Clin Infect Dis.* 2011;53(9):860-9.
- 354 5. Imwattana K, Knight DR, Kullin B, Collins DA, Putsathit P, Kiratisin P, et al. Antimicrobial  
355 resistance in *Clostridium difficile* ribotype 017. *Expert Rev Anti Infect Ther.* 2020;18(1):17-  
356 25.
- 357 6. Lyerly DM, Saum KE, MacDonald DK, Wilkins TD. Effects of *Clostridium difficile* toxins  
358 given intragastrically to animals. *Infect Immun.* 1985;47(2):349-52.
- 359 7. Lyerly DM, Sullivan NM, Wilkins TD. Enzyme-linked immunosorbent assay for *Clostridium*  
360 *difficile* toxin A. *J Clin Microbiol.* 1983;17(1):72-8.
- 361 8. al-Barrak A, Embil J, Dyck B, Olekson K, Nicoll D, Alfa M, et al. An outbreak of toxin A  
362 negative, toxin B positive *Clostridium difficile*-associated diarrhea in a Canadian tertiary-care  
363 hospital. *Can Commun Dis Rep.* 1999;25(7):65-9.
- 364 9. Putsathit P, Maneerattanaporn M, Piewngam P, Kiratisin P, Riley TV. Prevalence and  
365 molecular epidemiology of *Clostridium difficile* infection in Thailand. *New Microbes New*  
366 *Infect.* 2017;15:27-32.
- 367 10. Imwattana K, Wangroongsarb P, Riley TV. High prevalence and diversity of *tcdA*-negative  
368 and *tcdB*-positive, and non-toxigenic, *Clostridium difficile* in Thailand. *Anaerobe.* 2019;57:4-  
369 10.
- 370 11. Riley TV, Collins DA, Karunakaran R, Kahar MA, Adnan A, Hassan SA, et al. High  
371 prevalence of toxigenic and non-toxigenic *Clostridium difficile* in Malaysia. *J Clin Microbiol.*  
372 2018;56(6):e00170-18.
- 373 12. Collins DA, Gasem MH, Habibie TH, Arinton IG, Hendriyanto P, Hartana AP, et al.  
374 Prevalence and molecular epidemiology of *Clostridium difficile* infection in Indonesia. *New*  
375 *Microbes New Infect.* 2017;18:34-7.
- 376 13. Rupnik M, Kato N, Grabnar M, Kato H. New types of toxin A-negative, toxin B-positive  
377 strains among *Clostridium difficile* isolates from Asia. *J Clin Microbiol.* 2003;41(3):1118-25.
- 378 14. Cairns MD, Preston MD, Hall CL, Gerding DN, Hawkey PM, Kato H, et al. Comparative  
379 genome analysis and global phylogeny of the toxin variant *Clostridium difficile* PCR ribotype  
380 017 reveals the evolution of two independent sublineages. *J Clin Microbiol.* 2017;55(3):865-  
381 76.
- 382 15. Xu X, Luo Y, Chen H, Song X, Bian Q, Wang X, et al. Genomic evolution and virulence  
383 association of *Clostridioides difficile* sequence type 37 (ribotype 017) in China. *Emerg*  
384 *Microbes Infect.* 2021.
- 385 16. Imwattana K, Putsathit P, Knight DR, Kiratisin P, Riley TV. Molecular characterization of,  
386 and antimicrobial resistance in, *Clostridioides difficile* from Thailand, 2017-2018. *Microb*  
387 *Drug Resist.* 2021.

- 388 17. Vernon JJ. Multidrug resistant *Clostridioides difficile*: the presence of antimicrobial resistance  
389 Determinants in Historical and contemporaneous isolates, and the impact of fluoroquinolone  
390 resistance development on PCR ribotype 027 fitness: University of Leeds; 2019.
- 391 18. Inouye M, Dashnow H, Raven LA, Schultz MB, Pope BJ, Tomita T, et al. SRST2: Rapid  
392 genomic surveillance for public health and hospital microbiology labs. *Genome Med.*  
393 2014;6(11):90.
- 394 19. Knight DR, Squire MM, Collins DA, Riley TV. Genome analysis of *Clostridium difficile*  
395 PCR ribotype 014 lineage in Australian pigs and humans reveals a diverse genetic repertoire  
396 and signatures of long-range interspecies transmission. *Front Microbiol.* 2016;7:2138.
- 397 20. He M, Sebahia M, Lawley TD, Stabler RA, Dawson LF, Martin MJ, et al. Evolutionary  
398 dynamics of *Clostridium difficile* over short and long time scales. *Proc Natl Acad Sci U S A.*  
399 2010;107(16):7527-32.
- 400 21. Wick RR, Judd LM, Gorrie CL, Holt KE. Unicycler: Resolving bacterial genome assemblies  
401 from short and long sequencing reads. *PLoS Comput Biol.* 2017;13(6):e1005595.
- 402 22. Wick RR, Schultz MB, Zobel J, Holt KE. Bandage: interactive visualization of de novo  
403 genome assemblies. *Bioinformatics.* 2015;31(20):3350-2.
- 404 23. Tatusova T, DiCuccio M, Badretdin A, Chetvernin V, Nawrocki EP, Zaslavsky L, et al. NCBI  
405 prokaryotic genome annotation pipeline. *Nucleic Acids Res.* 2016;44(14):6614-24.
- 406 24. Imwattana K, Kiratisin P, Riley TV, Knight DR. Genomic basis of antimicrobial resistance in  
407 non-toxigenic *Clostridium difficile* in Southeast Asia. *Anaerobe.* 2020;66:102290.
- 408 25. Gupta SK, Padmanabhan BR, Diene SM, Lopez-Rojas R, Kempf M, Landraud L, et al. ARG-  
409 ANNOT, a new bioinformatic tool to discover antibiotic resistance genes in bacterial  
410 genomes. *Antimicrob Agents Chemother.* 2014;58(1):212-20.
- 411 26. Cingolani P, Platts A, Wang le L, Coon M, Nguyen T, Wang L, et al. A program for  
412 annotating and predicting the effects of single nucleotide polymorphisms, SnpEff: SNPs in  
413 the genome of *Drosophila melanogaster* strain w1118; iso-2; iso-3. *Fly (Austin).*  
414 2012;6(2):80-92.
- 415 27. Danecek P, Auton A, Abecasis G, Albers CA, Banks E, DePristo MA, et al. The variant call  
416 format and VCFtools. *Bioinformatics.* 2011;27(15):2156-8.
- 417 28. Croucher NJ, Page AJ, Connor TR, Delaney AJ, Keane JA, Bentley SD, et al. Rapid  
418 phylogenetic analysis of large samples of recombinant bacterial whole genome sequences  
419 using Gubbins. *Nucleic Acids Res.* 2015;43(3):e15.
- 420 29. Eyre DW, Walker AS. *Clostridium difficile* surveillance: harnessing new technologies to  
421 control transmission. *Expert Rev Anti Infect Ther.* 2013;11(11):1193-205.
- 422 30. Didelot X, Eyre DW, Cule M, Ip CL, Ansari MA, Griffiths D, et al. Microevolutionary  
423 analysis of *Clostridium difficile* genomes to investigate transmission. *Genome Biol.*  
424 2012;13(12):R118.
- 425 31. Didelot X, Croucher NJ, Bentley SD, Harris SR, Wilson DJ. Bayesian inference of ancestral  
426 dates on bacterial phylogenetic trees. *Nucleic Acids Res.* 2018;46(22):e134.
- 427 32. Letunic I, Bork P. Interactive Tree Of Life (iTOL) v4: recent updates and new developments.  
428 *Nucleic Acids Res.* 2019;47(W1):W256-W9.
- 429 33. Argimon S, Abudahab K, Goater RJE, Fedosejev A, Bhai J, Glasner C, et al. Microreact:  
430 visualizing and sharing data for genomic epidemiology and phylogeography. *Microb Genom.*  
431 2016;2(11):e000093.
- 432 34. Imwattana K, Putsathit P, Leepattarakit T, Kiratisin P, Riley TV. Mild or Malign: Clinical  
433 Characteristics and Outcomes of *Clostridium difficile* Infection in Thailand. *J Clin Microbiol.*  
434 2020;58(9).
- 435 35. Jain C, Rodriguez-R LM, Phillippy AM, Konstantinidis KT, Aluru S. High throughput ANI  
436 analysis of 90K prokaryotic genomes reveals clear species boundaries. *Nat Commun.* 2018;9.
- 437 36. Knight DR, Imwattana K, Kullin B, Guerrero-Araya E, Paredes-Sabja D, Didelot X, et al.  
438 Major genetic discontinuity and novel toxigenic species in *Clostridioides difficile* taxonomy.  
439 *eLife.* 2021;10:e64325.
- 440 37. Tonkin-Hill G, MacAlasdair N, Ruis C, Weimann A, Horesh G, Lees JA, et al. Producing  
441 polished prokaryotic pangenomes with the Panaroo pipeline. *Genome Biol.* 2020;21(1):180.

- 442 38. Brynildsrud O, Bohlin J, Scheffer L, Eldholm V. Rapid scoring of genes in microbial pan-  
443 genome-wide association studies with Scoary. *Genome Biol.* 2016;17(1):238.
- 444 39. Tasteyre A, Barc MC, Karjalainen T, Dodson P, Hyde S, Bourlioux P, et al. A *Clostridium*  
445 *difficile* gene encoding flagellin. *Microbiology (Reading)*. 2000;146 ( Pt 4):957-66.
- 446 40. Purcell EB, McKee RW, McBride SM, Waters CM, Tamayo R. Cyclic diguanylate inversely  
447 regulates motility and aggregation in *Clostridium difficile*. *J Bacteriol.* 2012;194(13):3307-16.
- 448 41. Geric B, Carman RJ, Rupnik M, Genheimer CW, Sambol SP, Lyerly DM, et al. Binary toxin-  
449 producing, large clostridial toxin-negative *Clostridium difficile* strains are enterotoxic but do  
450 not cause disease in hamsters. *J Infect Dis.* 2006;193(8):1143-50.
- 451 42. Isidro J, Santos A, Nunes A, Borges V, Silva C, Vieira L, et al. Imipenem resistance in  
452 *Clostridium difficile* ribotype 017, Portugal. *Emerg Infect Dis.* 2018;24(4):741-5.
- 453 43. Bordeleau E, Fortier LC, Malouin F, Burrus V. c-di-GMP turn-over in *Clostridium difficile* is  
454 controlled by a plethora of diguanylate cyclases and phosphodiesterases. *PLoS Genet.*  
455 2011;7(3):e1002039.
- 456 44. Sievers F, Wilm A, Dineen D, Gibson TJ, Karplus K, Li WZ, et al. Fast, scalable generation  
457 of high-quality protein multiple sequence alignments using Clustal Omega. *Mol Syst Biol.*  
458 2011;7.
- 459 45. Dingle KE, Elliott B, Robinson E, Griffiths D, Eyre DW, Stoesser N, et al. Evolutionary  
460 history of the *Clostridium difficile* pathogenicity locus. *Genome Biol Evol.* 2014;6(1):36-52.
- 461 46. Meyers BR, Kaplan K, Weinstein L. Microbiological and pharmacological behavior of 7-  
462 chlorolincomycin. *Appl Microbiol.* 1969;17(5):653-7.
- 463 47. He M, Miyajima F, Roberts P, Ellison L, Pickard DJ, Martin MJ, et al. Emergence and global  
464 spread of epidemic healthcare-associated *Clostridium difficile*. *Nat Genet.* 2013;45(1):109-13.
- 465 48. Lynch JP, 3rd, File TM, Jr., Zhanel GG. Levofloxacin for the treatment of community-  
466 acquired pneumonia. *Expert Rev Anti Infect Ther.* 2006;4(5):725-42.
- 467 49. Goorhuis A, Legaria MC, van den Berg RJ, Harmanus C, Klaassen CH, Brazier JS, et al.  
468 Application of multiple-locus variable-number tandem-repeat analysis to determine clonal  
469 spread of toxin A-negative *Clostridium difficile* in a general hospital in Buenos Aires,  
470 Argentina. *Clin Microbiol Infect.* 2009;15(12):1080-6.
- 471 50. Khanafer N, Daneman N, Greene T, Simor A, Vanhems P, Samore M, et al. Susceptibilities  
472 of clinical *Clostridium difficile* isolates to antimicrobials: a systematic review and meta-  
473 analysis of studies since 1970. *Clin Microbiol Infect.* 2018;24(2):110-7.
- 474 51. Daigle DM, Hughes DW, Wright GD. Prodigious substrate specificity of AAC(6')-APH(2''),  
475 an aminoglycoside antibiotic resistance determinant in enterococci and staphylococci. *Chem*  
476 *Biol.* 1999;6(2):99-110.
- 477 52. Neumann-Schaal M, Jahn D, Schmidt-Hohagen K. Metabolism the difficile way: the key to  
478 the success of the pathogen *Clostridioides difficile*. *Front Microbiol.* 2019;10:219.
- 479 53. Bateman A, Martin MJ, Orchard S, Magrane M, Agivetova R, Ahmad S, et al. UniProt: the  
480 universal protein knowledgebase in 2021. *Nucleic Acids Research.* 2021;49(D1):D480-D9.
- 481 54. Cairns MD, Preston MD, Lawley TD, Clark TG, Stabler RA, Wren BW. Genomic  
482 epidemiology of a protracted hospital outbreak caused by a toxin A-negative *Clostridium*  
483 *difficile* sublineage PCR ribotype 017 strain in London, England. *J Clin Microbiol.*  
484 2015;53(10):3141-7.
- 485 55. Rodriguez-Palacios A, Stampfli HR, Duffield T, Peregrine AS, Trotz-Williams LA, Arroyo  
486 LG, et al. *Clostridium difficile* PCR ribotypes in calves, Canada. *Emerg Infect Dis.*  
487 2006;12(11):1730-6.
- 488 56. Lim SC, Knight DR, Riley TV. *Clostridium difficile* and one health. *Clin Microbiol Infect.*  
489 2020;26(7):857-63.
- 490 57. Bradley RS. Chapter 3 - Dating Methods I. In: Bradley RS, editor. *Paleoclimatology*. 3rd ed:  
491 Academic Press; 2015. p. 55-101.
